# Supplementary material for: Arsenic Mobilization and Transformation by Ammonium-Generating Bacteria Isolated from High Arsenic Groundwater in Hetao Plain, China
Source: MDPI journal article supplement (doi:10.3390/ijerph19159606), 2022-08-04
Supplement: s1 [file s1]

## ***Supplementary Materials***

### **Arsenic mobilization and transformation by ammonium-generating bacteria isolated from high arsenic groundwater in Hetao Plain, China**

**Zhou Jiang<sup>1,2</sup>, Xin Shen<sup>1</sup>, Bo Shi<sup>1</sup>, Mengjie Cui<sup>1</sup>, Yanhong Wang<sup>2</sup>, Ping Li<sup>2\*</sup>**

<sup>1</sup>School of Environmental Studies, China University of Geosciences, Wuhan, 430074, P.R. China

<sup>2</sup>State Key Laboratory of Biogeology and Environmental Geology, China University of Geosciences, Wuhan, 430074, P.R. China

**\* Corresponding author:** pli@cug.edu.cn

**Supplementary Figures (S1–S9) and Tables (S1) and pages 11**

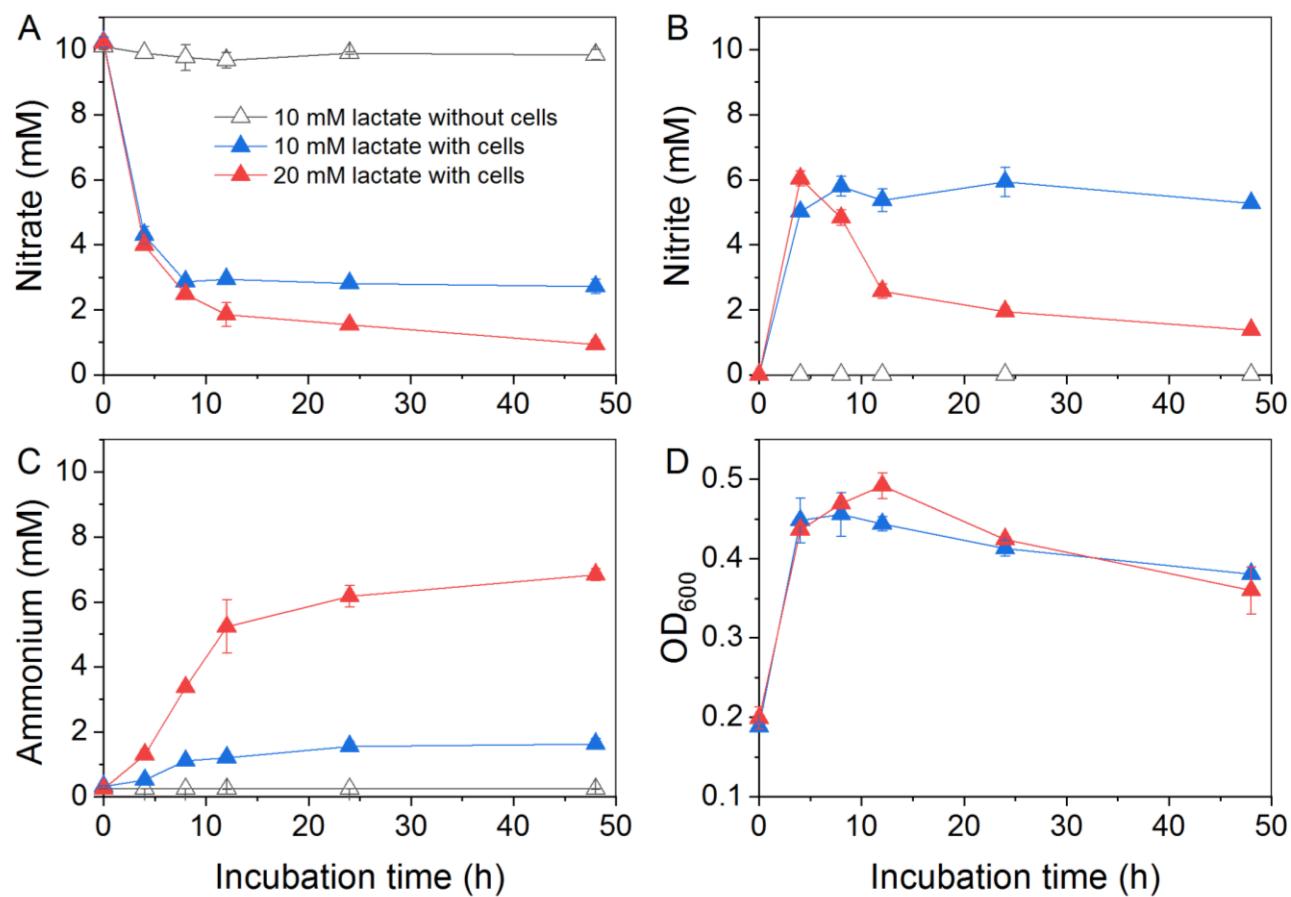

**Figure S1.** DNRA of *Citrobacter* sp. G-C1 and its growth in CDM medium supplemented with 10 mM nitrate and different concentrations of lactate.

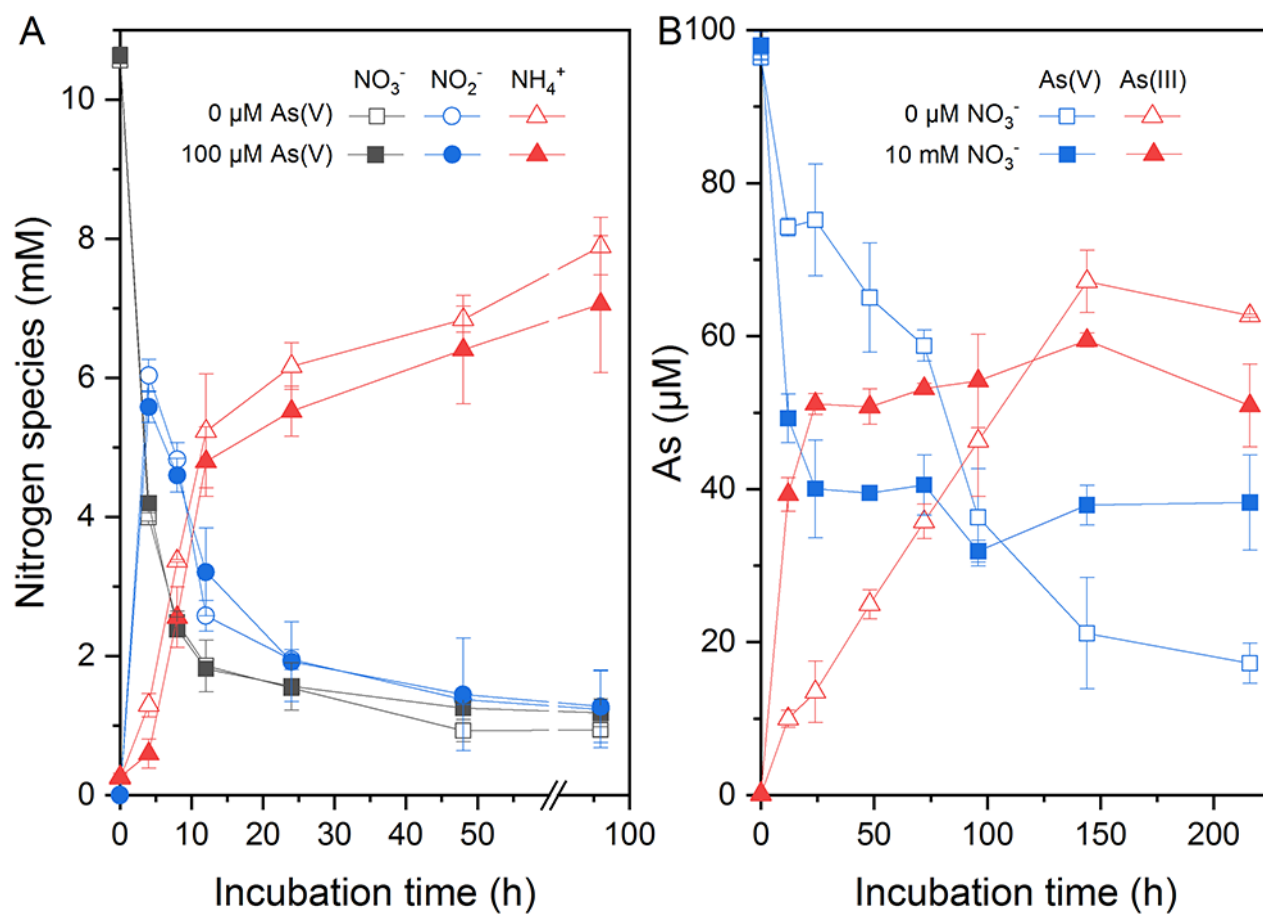

**Figure S2.** Effect of 100  $\mu\text{M}$  As(V) on DNRA process by *Citrobacter* sp. G-C1 in CDM medium supplemented with 20 mM lactate, 10 mM nitrate and 100  $\mu\text{M}$  As(V) (A) and effect of DNRA process by *Citrobacter* sp. G-C1 on As(V) reduction in CDM medium supplemented with 20 mM lactate, 100  $\mu\text{M}$  As(V) and 10 mM nitrate (B).

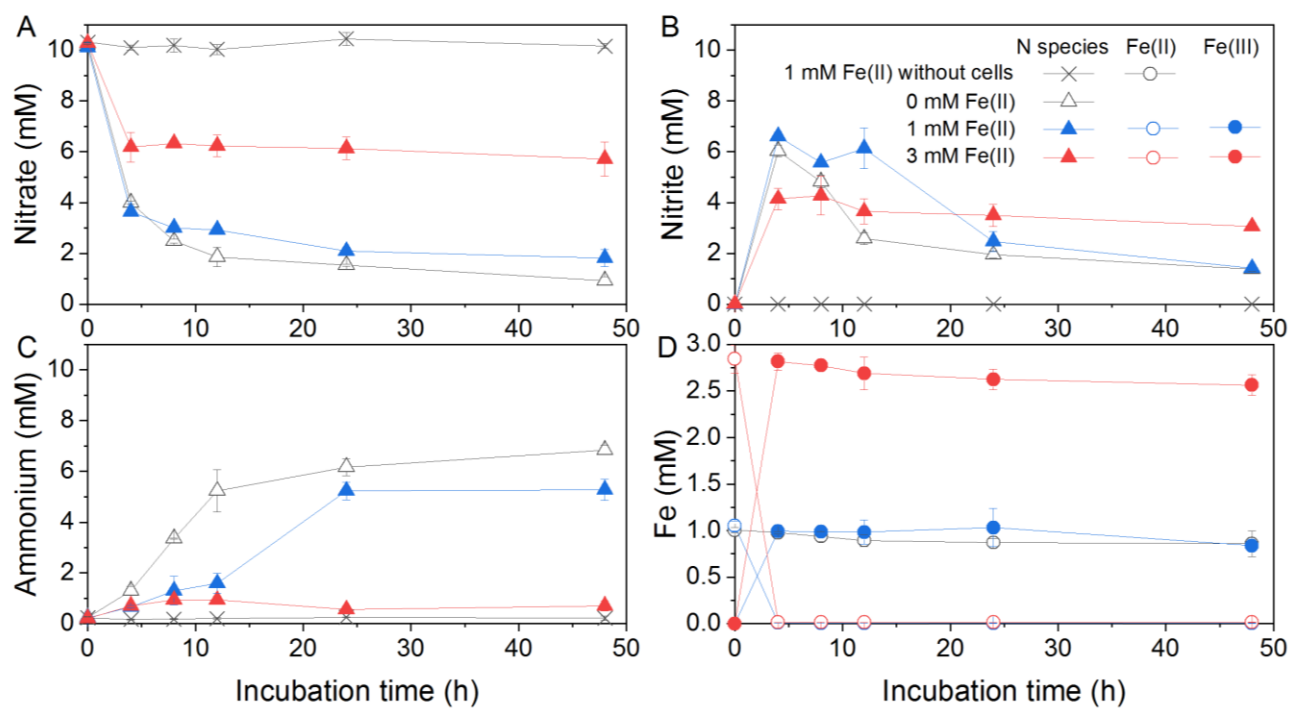

**Figure S3.** Fe(II) effect on DNRA process by *Citrobacter* sp. G-C1 in CDM medium supplemented with 20 mM lactate, 10 mM nitrate and different concentrations of Fe(II).

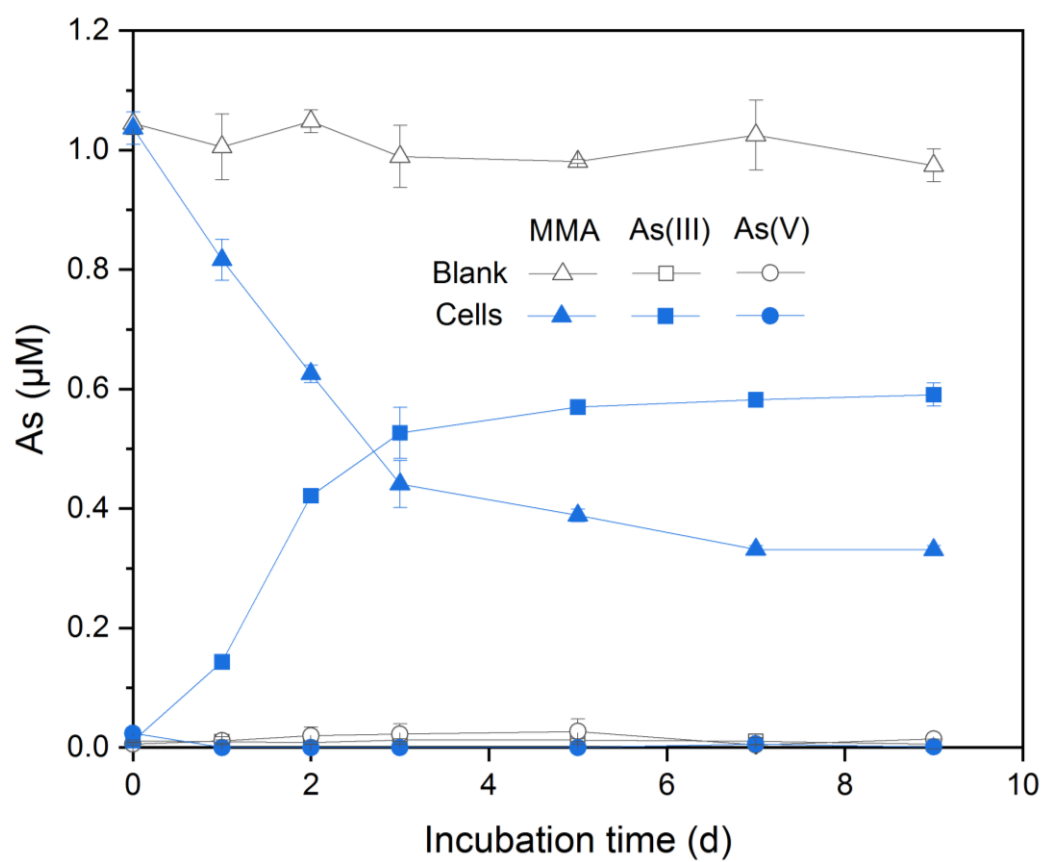

**Figure S4.** MMA demethylation by *Citrobacter* sp. G-C1 in anaerobic ST10-1 medium supplemented with 1  $\mu\text{M}$  MMA

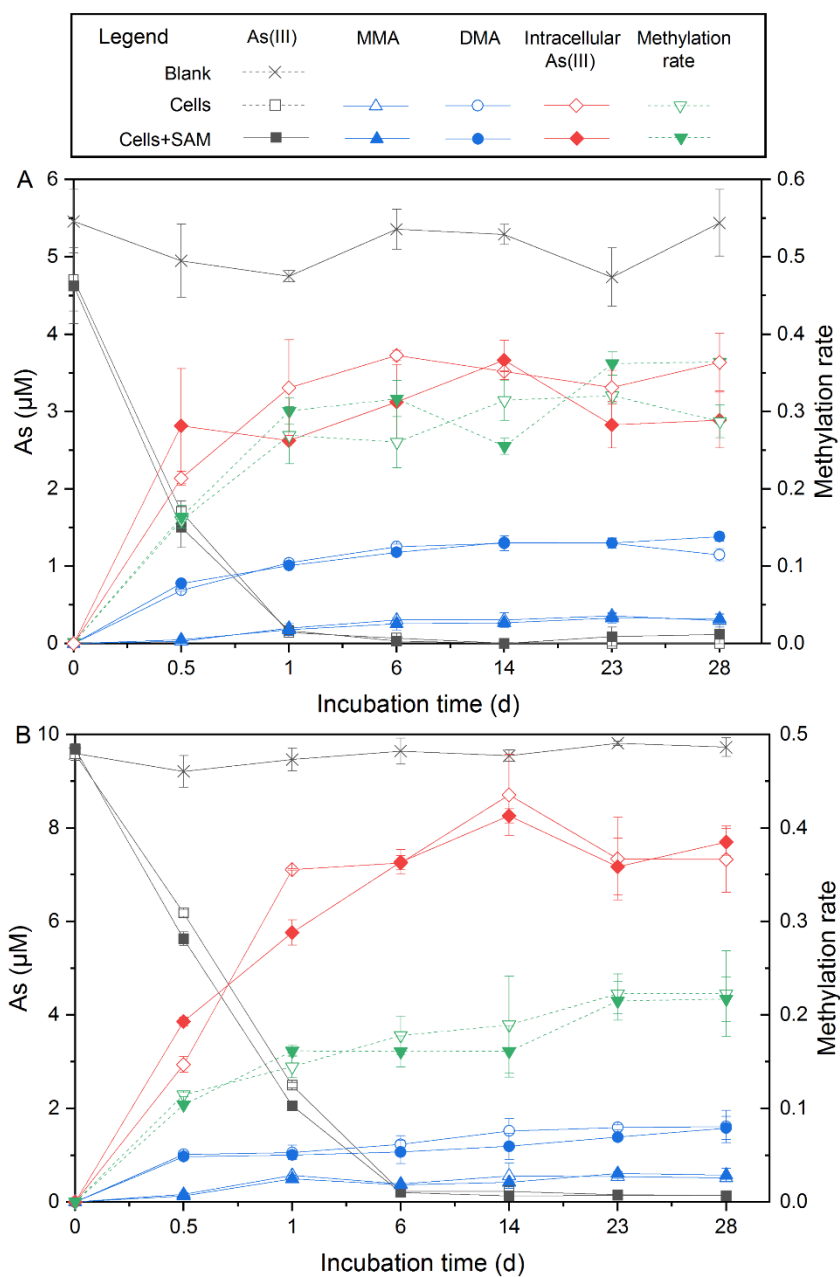

**Figure S5.** As(III) methylation by *Paraclostridium* sp. G-11 in anaerobic LB medium supplemented with 5  $\mu$ M As(III) (A) and 10  $\mu$ M As(III) (B). SAM addition was to determine the effect of methyl donor for As biomethylation.

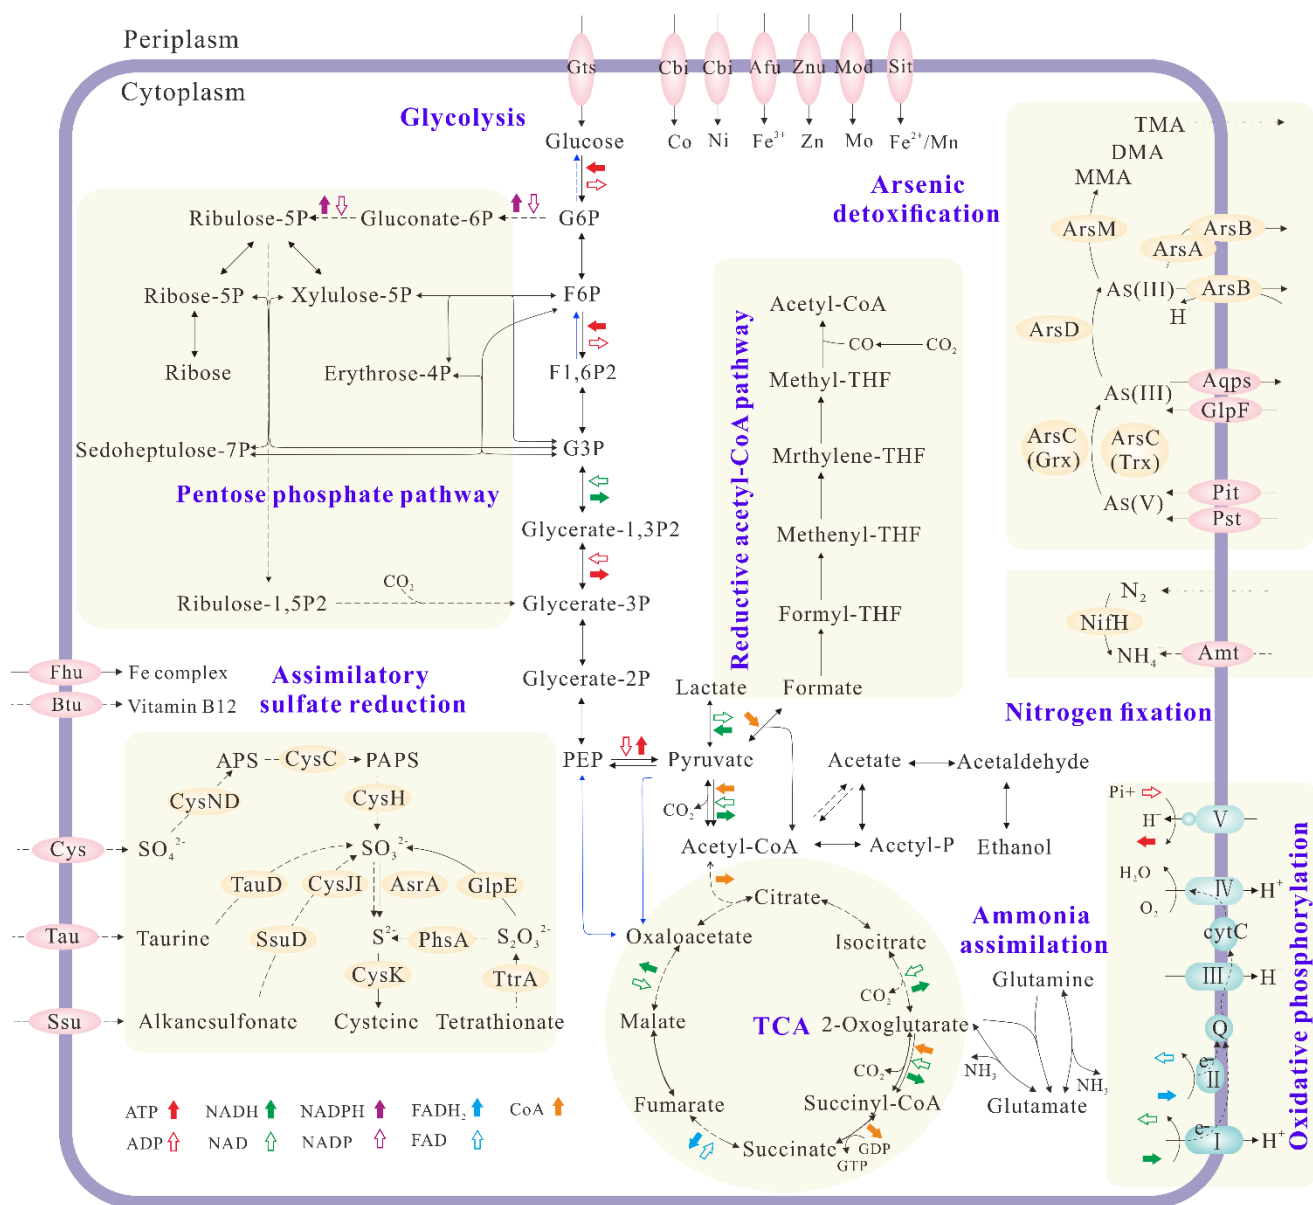

**Figure S6.** Overview metabolic potential of *Paraclostridium* sp. G-11 inferred from genome functional annotation. Solid and dotted arrows indicate the presence and absence of key functional genes in the KEGG pathways. Genes related to N, As and S metabolisms and membrane transporters were shown and genes related to C metabolism were omitted.

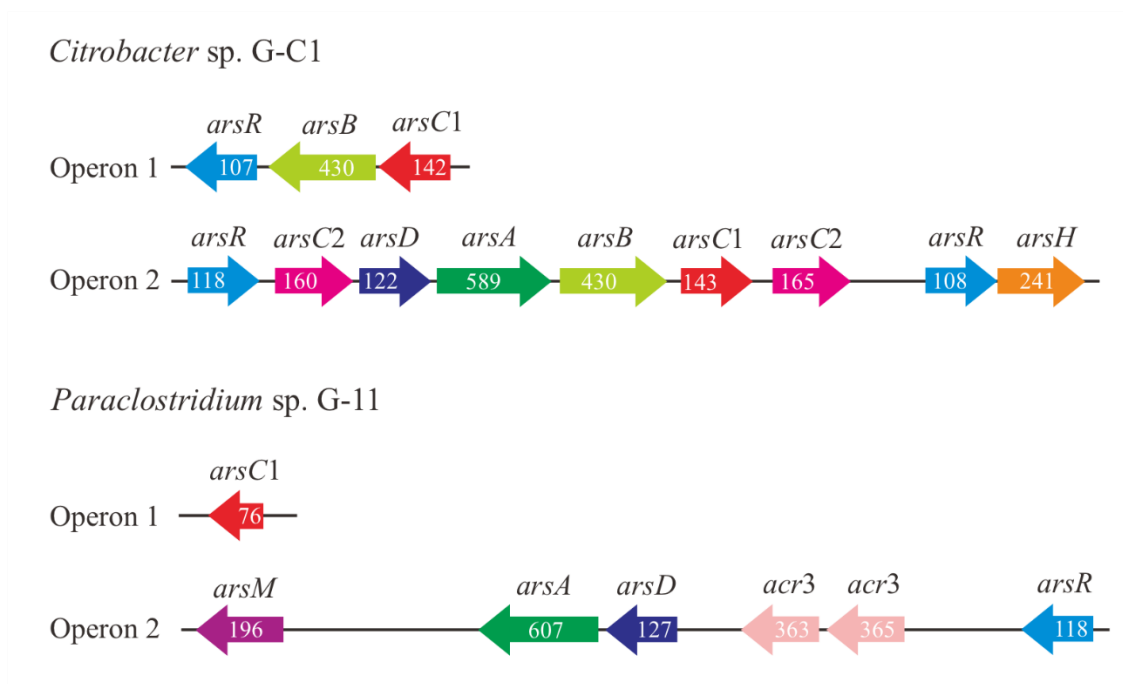

**Figure S7.** The *ars* operon in the *Citrobacter* sp. G-C1 and *Paraclostridium* sp. G-11. The white number on the arrow shows the length of amino acid sequence. *arsC1* and *arsC2* refer to As(V) reductase (glutaredoxin) and As(V) reductase (thioredoxin), respectively.



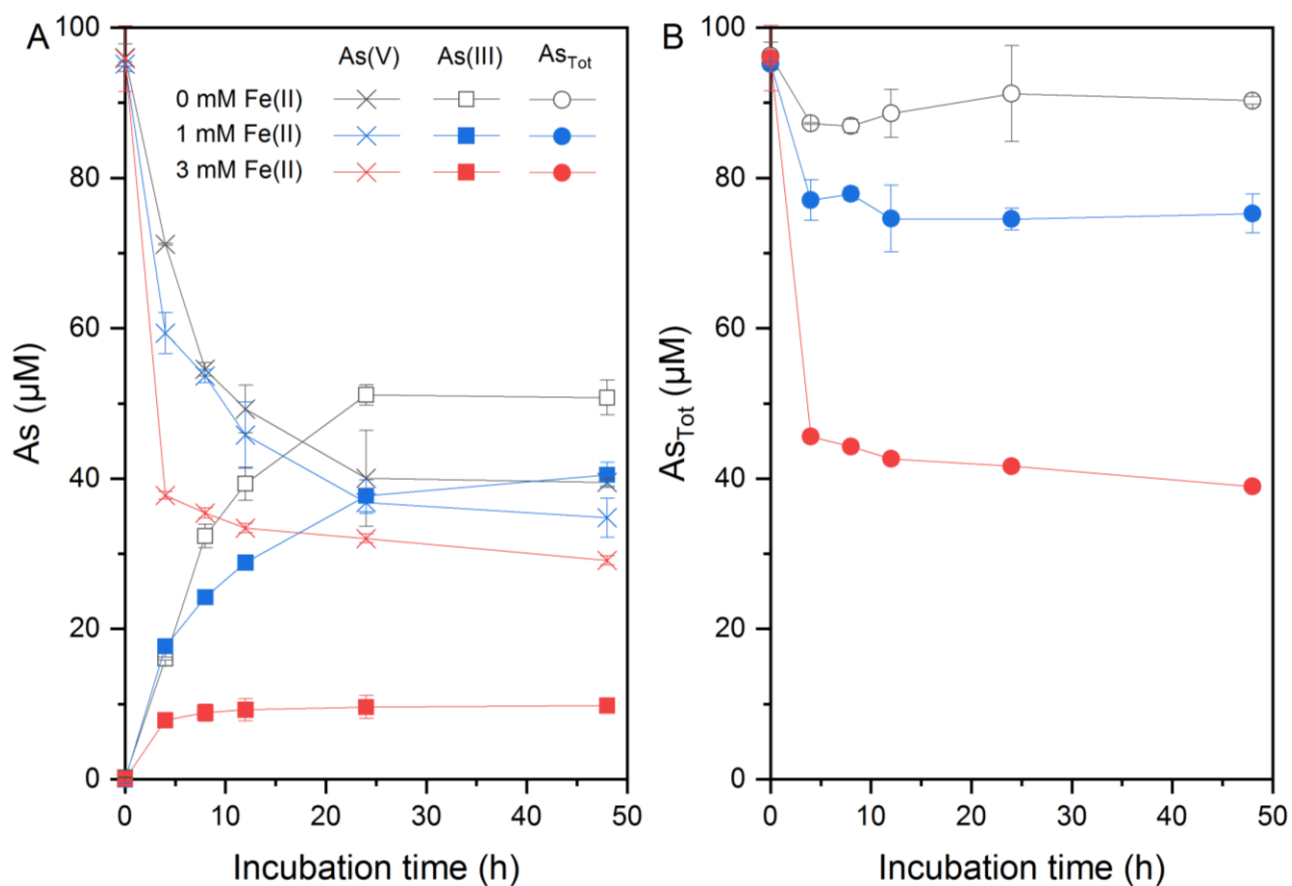

**Figure S8.** The concentrations of dissolved As(V) and As(III) during DNRA process by *Citrobacter* sp. G-C1 in CDM medium supplemented with 20 mM lactate, 10 mM nitrate, 100 μM As(V) and different concentrations of Fe(II).

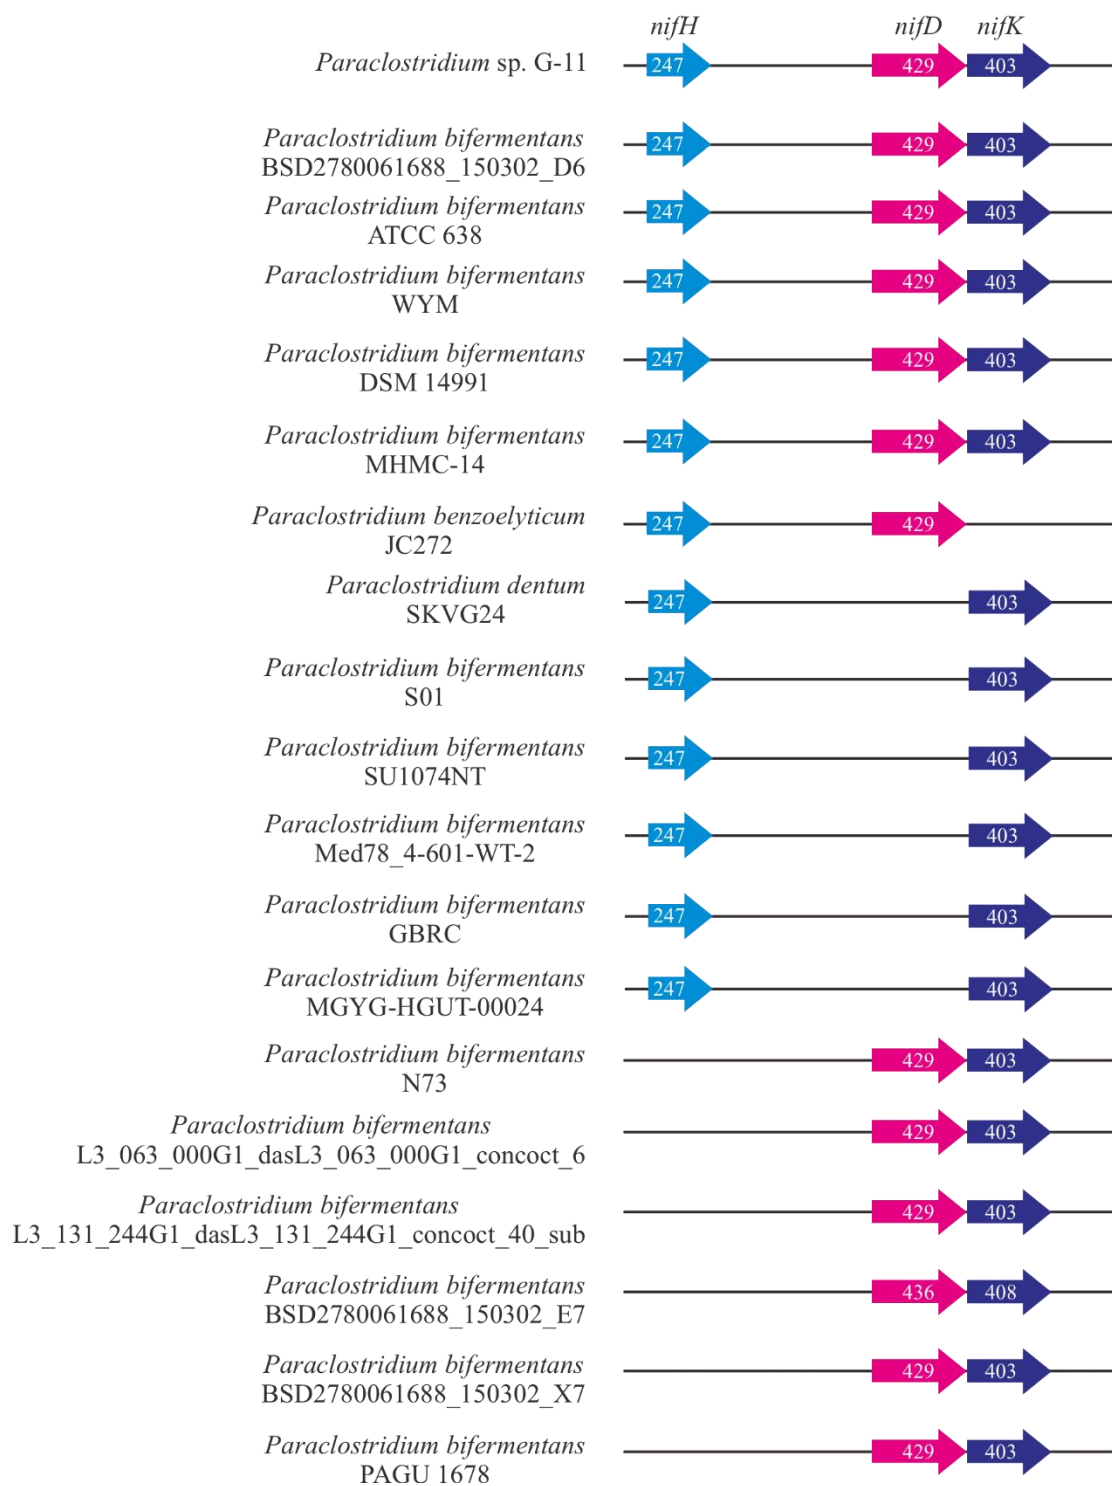

**Figure S9.** The *nif* operon in the *Paraclostridium* sp. G-11 and *Paraclostridium* spp. deposited in NCBI genome database until April 27, 2022. The white number on the arrow shows the length of amino acid sequence.

**Table S1.** Genome assembly statistics of *Citrobacter* sp. G-C1  
and *Paraclostridium* sp. G-11

| Assembly statistics                       | <i>Citrobacter</i> sp.<br>G-C1 | <i>Paraclostridium</i> sp.<br>G-11 |
|-------------------------------------------|--------------------------------|------------------------------------|
| Raw reads number                          | 7,709,834                      | 9,488,958                          |
| Raw reads length (bp)                     | 1,156,475,100                  | 1,423,343,700                      |
| Clean reads number                        | 7,491,204                      | 9,153,882                          |
| Clean reads length (bp)                   | 1,111,278,815                  | 1,350,929,410                      |
| Clean reads Q20 (%)                       | 100                            | 100                                |
| Clean reads Q30 (%)                       | 96.84                          | 97.54                              |
| Clean reads GC (%)                        | 51.00                          | 28                                 |
| Scaffold total number                     | 51                             | 55                                 |
| Scaffold total length (bp)                | 5,187,053                      | 3,537,600                          |
| Scaffold average length (bp)              | 101,707                        | 64,320                             |
| Scaffold maximum length (bp)              | 901,877                        | 920,841                            |
| Scaffold shortest length (bp)             | 509                            | 505                                |
| Scaffold N50 length (bp)                  | 499,327                        | 301,435                            |
| Scaffold N90 length (bp)                  | 85120                          | 58361                              |
| Scaffold GC (%)                           | 51.59                          | 28.22                              |
| Genome size (bp)                          | 5187053                        | 3537600                            |
| Protein coding genes number from Scaffold | 5,214                          | 3,432                              |
| Protein coding genes total length (bp)    | 4,536,630                      | 3,047,082                          |
| Protein coding genes average length (bp)  | 870                            | 888                                |
| Protein coding genes length/Genome (%)    | 87.46                          | 86.13                              |
| rRNA number                               | 10                             | 16                                 |
| tRNA number                               | 78                             | 62                                 |
| sRNA number                               | 56                             | 1                                  |
